# Supplementary material
Source: PubMed Central journal article supplement (PMC4054314)
Supplement: MCB.00181-14_zmb013140483so1.pdf [file MCB.00181-14_zmb013140483so1.pdf]

## 1 Supplemental Figure Legends

2 **Figure S1.** Schematic diagram of the construction of Rpb1 conditional knock-out cell line.

3 **Figure S2.** Amino-acid sequence comparison between human (denoted as query) and chicken  
4 (subject) Rpb1 using blastp.

5 **Figure S3.** Ser 2, Ser 5 and Ser 7 phosphorylation patterns in mutant cells. Cells were treated  
6 with tet for 24 hours. Cell lysates were analyzed by western blotting using indicated antibodies.  
7 (A) Ser 7 levels. (B) CTD phosphorylation status in various mutant cells. Thr4P was not detected  
8 in S5A and S7A samples. This negative result is difficult to interpret because the antibody could  
9 simply not recognize Thr4P on the CTD with S5A or S7A mutations. Samples were prepared as in  
10 Figure 4B.

11 **Figure S4.** Coomassie blue staining of purified GST-CTD, Fcp1, Fcp1 (M271E), and CDK9/cyclin T  
12 complex. Arrow indicates the purified protein resolved by SDS-PAGE.

13 **Figure S5.** *In vitro* phosphorylation of Thr 4. GST-CTD was incubated with HeLa nuclear extract  
14 (left lane) or the indicated amount of CDK9/cyclinT plus or minus indicated inhibitors. Samples  
15 were analyzed by western blotting with antibodies that detect P-Thr 4, P-Ser 2, P-Ser 5, and P-  
16 Ser 7.

17 **Figure S6.** Fcp1 mRNA levels in shRNA-treated HEK293 cells. Cells were transfected with  
18 plasmids expressing shRNAs targeting Fcp1 or GFP (control). RNA was extracted 22 h or 41 h  
19 after transfection, and RT-qPCR was performed to determine Fcp1 mRNA levels. Levels of Fcp1  
20 mRNA in Fcp1 shRNA expressing cells relative to control were plotted.

Construction of targeting vectors

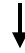

Disrupt one allele of *Rpb1* with the targeting vector carrying hygromycin-resistance gene

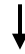

Introduce tetracycline repressive expression vector of HA-tagged human *Rpb1* and the tTA expression vector (tet-off)

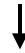

Disrupt second allele of *Rpb1* with the targeting vector carrying zeocin-resistance gene

Figure S2

|       |      |                                                                                                                                                                                                      |      |
|-------|------|------------------------------------------------------------------------------------------------------------------------------------------------------------------------------------------------------|------|
| Query | 13   | CPLRTIKRVQFGVLSPELKRMSVTEGGIKYPETTEGGRPKLGGMLDPRQGVIERTGRCQTCAGNMTECPGHFGHIELAKPVFHVGFVLK                                                                                                            | 102  |
| Sbjct | 1    | CPLRTIKRVQFG+LSPDE+KRMSVTEGGI+YPETTEGGRPKLGGMLDPRQGVIERTGRCQTCAGNMTECPGHFGHIELAKPVFHVGF L K<br>CPLRTIKRVQFGILSPDEMCRMSVTEGGIRYPETTEGGRPKLGGMLDPRQGVIERTGRCQTCAGNMTECPGHFGHIELAKPVFHVGF LK            | 90   |
| Query | 103  | TMKVLRCVCFSCSKLLVDSNNPKIKDILAKSKGQPKKRLTHVYDLCKGKNICEGGEEMDNKFGVEQPEGEDDLTKEKGHGGCGRYQPRIR                                                                                                           | 192  |
| Sbjct | 91   | TMK+LRCVCFSCSKLLVD+NNPKIKDILAKSKGQPKKRLTHVYDLCKGKNICEGGEEMD+KFGVEQ EGDE +EKHGGCGRYQPRIR<br>TMKILRCVCFSCSKLLVDANNPKIKDILAKSKGQPKKRLTHVYDLCKGKNICEGGEEMDHKFGVEQHEGDEP-GREKGGCGRYQPRIR                  | 179  |
| Query | 193  | RSGLELYAEWKHVNEDSQEKKILLSPERVHEIFKRISDEECFVLGMEPRYARPEWMIVTVLPVPPLSVRPAVVMQGSARNQDDLTHKLAD                                                                                                           | 282  |
| Sbjct | 180  | R GLELYAEWKHVNEDSQEKKILLSPERVHE+ KR+ D+EC VLG M+P+YARPEWM+ TVLPVPP L+VRPAVVMQGSARNQDDLTHKLAD<br>RVGLELYAEWKHVNEDSQEKKILLSPERVHEVLKRVDPDDECLVLGMDPKYARPEWMVCTVLPVPP LAVRPAVVMQGSARNQDDLTHKLAD         | 269  |
| Query | 283  | IVKINNQLRRNEQNGAAAHVIAEDVKLLQFHVATMVDNELPGLPRAMQKSGRPLKSLKQRLKKGEGRVRGNLMGKRVDFSARTVITPDPN                                                                                                           | 372  |
| Sbjct | 270  | IVKINNQLRRNEQNGAAAHVIAEDVKLLQFHVATMVDNELPGLPRAMQKSGRPLKSLKQRLKKGEGRVRGNLMGKRVDFSARTVITPDPN<br>IVKINNQLRRNEQNGAAAHVIAEDVKLLQFHVATMVDNELPGLPRAMQKSGRPLKSLKQRLKKGEGRVRGNLMGKRVDFSARTVITPDPN             | 359  |
| Query | 373  | LSIDQVGVPRISIAANMTFAEIVTPFNIDRLQELVRRGNSQYPGAKYIIRDNGRIDLRFHFKPSDLHLQTGYKVERHMCDDGDIVIFNRQP                                                                                                          | 462  |
| Sbjct | 360  | L+IDQVGVPRISIAANMTFAEIVTPFNIDRLQELVRRGNSQYPGAKYIIRDNGRIDLRFHFKPSDLHLQTGYKVERHMCDDGDIVIFNRQP<br>LAIDQVGVPRISIAANMTFAEIVTPFNIDRLQELVRRGNSQYPGAKYIIRDNGRIDLRFHFKPSDLHLQTGYKVERHMCDDGDIVIFNRQP           | 449  |
| Query | 463  | TLHKMSMMGHRVRIIPWSTFRLNLSVTTTPYNADFDGDEMNLHLPQSLETRAEIQELAMVPRMIVTPQSNRPFVMGIVQDTLTAVRKFTKRD                                                                                                         | 552  |
| Sbjct | 450  | TLHKMSMMGHRVRIIPWSTFRLNLSVTTTPYNADFDGDEMNLHLPQSLETRAEIQELAMVPRMIVTPQSNRPFVMGIVQDTLTAVRKFTKRD<br>TLHKMSMMGHRVRIIPWSTFRLNLSVTTTPYNADFDGDEMNLHLPQSLETRAEIQELAMVPRMIVTPQSNRPFVMGIVQDTLTAVRKFTKRD         | 539  |
| Query | 553  | VFLERGEVMNLLMFLSTWDGKVPQPAILKPRPLWTGKQIFSLIIPGHINCIRTHSTHPDDEDSGPYKHISPGDTKVVVENGELIMGILCK                                                                                                           | 642  |
| Sbjct | 540  | VFLERGEVMNLLMFLSTWDGKVPQPAILKPRPLWTGKQIFSLIIPGHINCIRTHSTHPDDEDSGPYKHISPGDTKVVVENGELIMGILCK<br>VFLERGEVMNLLMFLSTWDGKVPQPAILKPRPLWTGKQIFSLIIPGHINCIRTHSTHPDDEDSGPYKHISPGDTKVVVENGELIMGILCK             | 629  |
| Query | 643  | KSLGTSAGSLVHISYLEMGHDITRFLYSNIQTVINNWLLIEGHTIGIGDSIADSKTYQDIQNTIKKAKQDVIEIEKAHNELEPTPGNT                                                                                                             | 732  |
| Sbjct | 630  | KSLGTSAGSLVHISYLEMGHD TRFLYSNIQTVINNWLLIEGHTIGIGDSIAD+KTYQDIQNTIKKAKQDVIEIEKAHNELEPTPGNT<br>KSLGTSAGSLVHISYLEMGHDTTRFLYSNIQTVINNWLLIEGHTIGIGDSIADAKTYQDIQNTIKKAKQDVIEIEKAHNELEPTPGNT                 | 719  |
| Query | 733  | LRQTFENQVNRILNDARDKTGSSAQKSLSEYNNFKSMVSVGAKGSKINISQVIAVVGQQNVEGKRIPFGFKHRTLPHFIKDDYGPESRGF                                                                                                           | 822  |
| Sbjct | 720  | LRQTFENQVNRILNDARDKTGSSAQKSLSEYNNFKSMVSVGAKGSKINISQVIAVVGQQNVEGKRIPFGFKHRTLPHFIKDDYGPESRGF<br>LRQTFENQVNRILNDARDKTGSSAQKSLSEYNNFKSMVSVGAKGSKINISQVIAVVGQQNVEGKRIPFGFKHRTLPHFIKDDYGPESRGF             | 809  |
| Query | 823  | VENSYLAGLTPTEFFFHAMGGREGLIDTAVKTAETGYIQRRLIKSMESVMVKYDATVRNSINQVVQLRYGEDGLAGESVEFQNLATLKPS                                                                                                           | 912  |
| Sbjct | 810  | VENSYLAGLTPTEFFFHAMGGREGLIDTAVKTAETGYIQRRLIKSMESVMVKYDATVRNSINQVVQLRYGEDGLAGESVEFQNLATLKPS<br>VENSYLAGLTPTEFFFHAMGGREGLIDTAVKTAETGYIQRRLIKSMESVMVKYDATVRNSINQVVQLRYGEDGLAGESVEFQNLATLKPS             | 899  |
| Query | 913  | NKAFEEKKFRDYTNERALRRTLQEDLVKDVLSNAHIQNELEREFERMREDREVLRFVIFPTGDSKVVLPCNLLRMIWNAQKIFHINRPLPS                                                                                                          | 1002 |
| Sbjct | 900  | NKAFEEKK+FDYTNERALRRTLQE+LVKD+LSNAHIQNELEREFERMREDREVLRFVIFPTGDSKVVLPCNLLRMIWNAQKIFHIN RLPS<br>NKAFEEKKFRDYTNERALRRTLQEEVLKDVLSNAHIQNELEREFERMREDREVLRFVIFPTGDSKVVLPCNLLRMIWNAQKIFHINSRLPS           | 989  |
| Query | 1003 | DLHPKVVVEGVKELSKKLVIVNGDDPLSRQAQENATLLFNIHLRSTLCSRRMAEEFRLSGEAFDWLLGEIESKFNQAIHAPGEMVGALAA                                                                                                           | 1092 |
| Sbjct | 990  | DLHP+KVVVEGVKELS+KLVIVNG+DPLSRQAQENATLLFNIHLRSTLCSRRM EEFRLSGEAFDWLLGEIESKFNQAIHAPGEMVGALAA<br>DLHPKVVVEGVKELSRKLVIVNGEDPLSRQAQENATLLFNIHLRSTLCSRRMVEEFRLSGEAFDWLLGEIESKFNQAIHAPGEMVGALAA            | 1079 |
| Query | 1093 | QSLGEPATQMTLNTFHYAGVSAKNVTLGVPRKELINISKKPKTPSLTVFLGQSARDAERAKDILCRLEHTTLRKVTANTAIYYDPNPQ                                                                                                             | 1182 |
| Sbjct | 1080 | QSLGEPATQMTLNTFHYAGVSAKNVTLGVPRKELINISKKPKTPSLTVFLGQSARDAERAKDILCRLEHTTLRKVTANTAIYYDPNPQ<br>QSLGEPATQMTLNTFHYAGVSAKNVTLGVPRKELINISKKPKTPSLTVFLGQSARDAERAKDILCRLEHTTLRKVTANTAIYYDPNPQ                 | 1169 |
| Query | 1183 | STVVAEDQEWNVVYEMPFDVARI SPWLLRVELDRKHMTDRKLTMEQIAEKINAGFGDDLNCIFNDDNAEKLVLIRIRIMNSDENKMQUEE                                                                                                          | 1272 |
| Sbjct | 1170 | STVVAEDQEWNVVYEMPFDV+RISPWLLR+ELDRKHMTDRKLTMEQIAEKINAGFGDDLNCIFNDDNAEKLVLIRIRIMNSDENKMQUEE<br>STVVAEDQEWNVVYEMPFDVSRISPWLLRIELDRKHMTDRKLTMEQIAEKINAGFGDDLNCIFNDDNAEKLVLIRIRIMNSDENKMQUEE             | 1259 |
| Query | 1273 | EEVVDKMDDDVFLRCIESNMLTDMTLQGIEQISKVYMHLPTDNKKKIIITEDGEFKALQEWILETDGVS LMRVLSEKDVDPVRTSNDI                                                                                                            | 1362 |
| Sbjct | 1260 | EEVVDKMDDDVFLRCIESNMLTDMTLQGIEQISKVYMHLPTDNKKKIIITEDGEFKALQEWILETDGVS LMRVLSEKDVDPVRTSNDI<br>EEVVDKMDDDVFLRCIESNMLTDMTLQGIEQISKVYMHLPTDNKKKIIITEDGEFKALQEWILETDGVS LMRVLSEKDVDPVRTSNDI               | 1349 |
| Query | 1363 | VEIFTVLGIEAVRKALERELYHVISFDGSYVNYRHALLCOTMTCRGHLMAITRHGVNRQDTGPLMKCSFEETVDVLMEEAAHGESDPMK                                                                                                            | 1452 |
| Sbjct | 1350 | VEIFTVLGIEAVRKALERELYHVISFDGSYVNYRHALLCOTMT RGHLMAITRHGVNRQDTGPLMKCSFEETVDVLMEEAAHGESDPMK<br>VEIFTVLGIEAVRKALERELYHVISFDGSYVNYRHALLCOTMTSRGHLMAITRHGVNRQDTGPLMKCSFEETVDVLMEEAAHGESDPMK               | 1439 |
| Query | 1453 | GVSENI MLGQLAPAGTGCFDLLLD A EKCKY GMEIPTNI PGLGAAGPTGMFFGSAPS PMGGISPAMTPWNQATPAYGAWSPSVGSGMTPG                                                                                                      | 1542 |
| Sbjct | 1440 | GVSENI MLGQLAPAGTGCFDLLLD A EKCK+GMEIP+ IPGLG G TGMFFGSAPS PMG +SPAMTPWNQATPAYGAWSPSVGSGMTPG<br>GVSENI MLGQLAPAGTGCFDLLLD A EKCKHGMEIPSAIPGLGVGGSTGMFFGSAPS PMGNMSPAMTPWNQATPAYGAWSPSVGSGMTPG        | 1529 |
| Query | 1543 | AAGFSPSAASDASGSPGYS PAWSPTPGSPGSPGSSPYIPSPGGAMSPYSPTS PAYEPRSPGGYTPQSPSYSPTS SPYSPTS SPYSPTS                                                                                                         | 1632 |
| Sbjct | 1530 | AAGFSPSAASDASGSPGYS PAWSPTPGSPGSPGSSPYIPSPGGAMSPYSPTS PAYEPRSPGGYTPQSPSYSPTS SPYSPTS SPYSPTS<br>GAGFSPSAASDASGSPGYS PAWSPTPGSPGSPGSSPYIPSPGGAMSPYSPTS PAYEPRSPGGYTPQSPSYSPTS SPYSPTS SPYSPTS         | 1619 |
| Query | 1633 | SPNYSPTS SPYSPTS                                                                                             | 1722 |
| Sbjct | 1620 | SPNYSPTS SPYSPTS SPYSPTS<br>SPNYSPTS SPYSPTS | 1709 |
| Query | 1723 | TSPSYSPTS SPYSPTS SPYSPTS SPNYSPTS 1752                                                                                                                                                              |      |
| Sbjct | 1710 | TSPSYSPTS SPYSPTS SPYSPTS SPNYSPTS 1739                                                                                                                                                              |      |

Figure S3

A

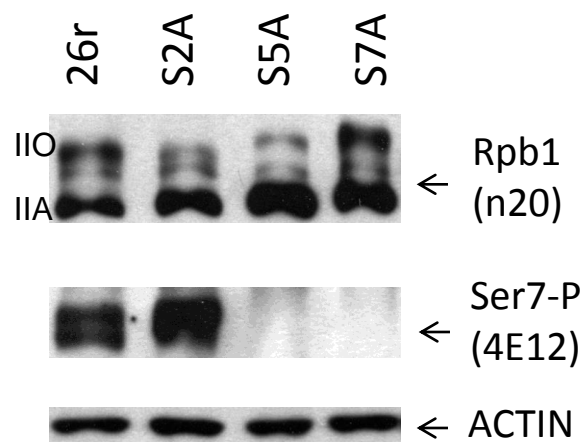

B

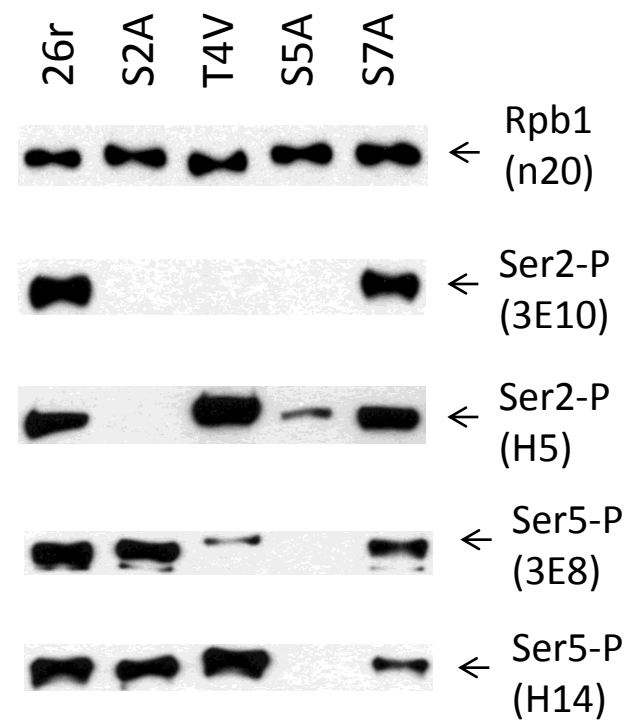

Figure S4

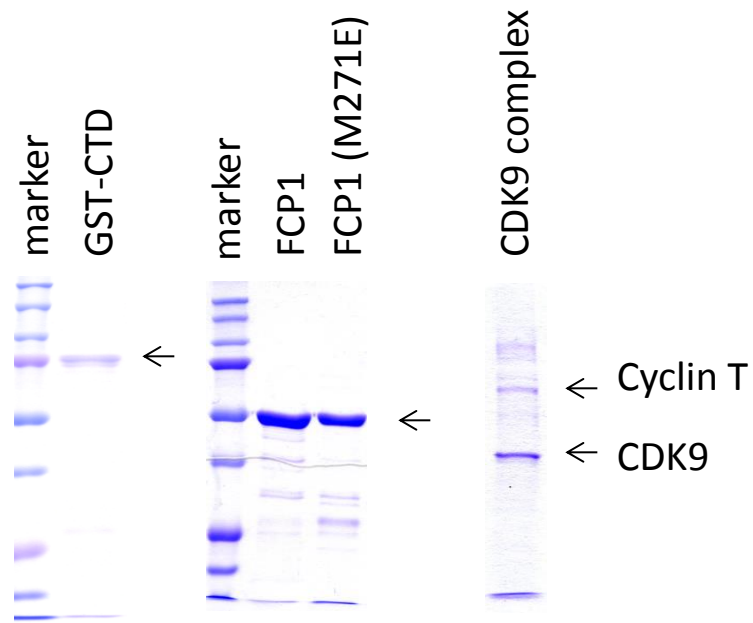

Figure S5

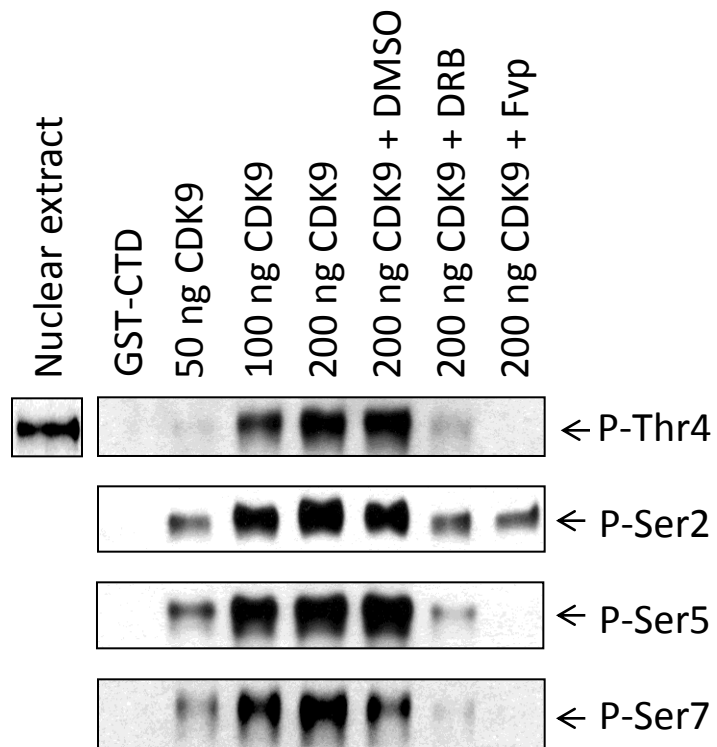

Figure S6

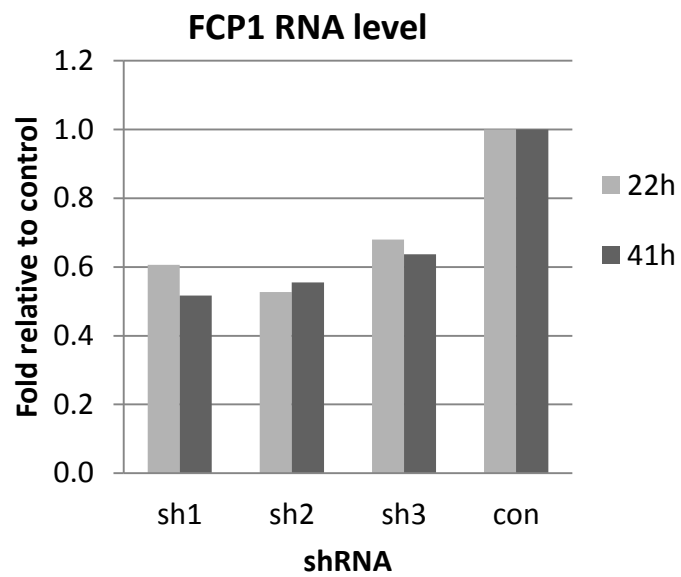

**Table S1.** Primer sequence list.

| Amplicon       | Primer      | Sequence               |
|----------------|-------------|------------------------|
| Unspliced egr1 | egr1_F2     | CGTTGCTGCTGGAGACCT     |
|                | egr1_2R1    | GGCATGGTTTTCTCGTTGTC   |
| Spliced egr1   | egr1_1F1    | GCCACTATCCCAAAGTGGAG   |
|                | egr1_2R1    | GGCATGGTTTTCTCGTTGTC   |
| Uncut egr1     | egr1_2F2    | CATGCGGTTTCATTATTTTGTG |
|                | egr1_3'R3   | GCACCCCTTACTTCCTAGCAG  |
| Total egr1     | egr1_2F5    | AAGACTCAAAATGTGGCAGAA  |
|                | egr1_2R7    | TTAAGGCAAGATGCAAAGCA   |
| Rplp1_A        | rplp1_p_F1  | TATGACAGCCATGAGGCAAG   |
|                | rplp1_p_R1  | ACGACCTAACATTTGAAGAAGC |
| Rplp1_B        | rplp1_p_F2  | TGGCTGATGGAGCCCTTAT    |
|                | rplp1_p_R2  | GGAACGGCCTTAGCTTCAG    |
| Rplp1_C        | rplp1_F3    | AGCTGAGAACAGAGGGACGA   |
|                | rplp1_R1    | GCACACAGAAAGAGGATCTGC  |
| Rplp1_D        | rplp1_3'_F1 | GATGACATGGGCTTTGGTCT   |
|                | rplp1_3'_R1 | CAGCCATCCTTGAGAAACACT  |
| Rplp1_E        | rplp1_3'_F2 | TGATAACAGTGCCTGCCTTG   |
|                | rplp1_3'_R2 | GAACAGCAGTGAGCATCCAA   |
| Actb_A         | actb_p_F1   | CTGACTGACCGCGTACTCC    |
|                | actb_p_R1   | CAGAAAAGAAACGAGCCGTCA  |
| Actb_B         | actb_2F     | ATGATATTGCTGCGCTCGTT   |
|                | actb_2R     | CCCACGATAGATGGGAACAC   |
| Actb_C         | actb_3'_F   | GGCTTGACTGGTGTGGTTT    |
|                | actb_3'_R   | GCAGATAGCTGACCCACACA   |
| H2A_TSS        | H2A_F3      | TCTTCGGTTGTACAGCAAGC   |
|                | H2A_R2      | CGACTTGGCCTTAGCTCTGA   |
| H2A_3'         | H2A_F2      | TTCAGAGCCACCCACTTTCT   |
|                | H2A_R1      | GCGTTAAAAACAAAGGCACA   |
| U1             | U1_F1       | CATGATCAGGCAGGTGGTTT   |
|                | U1_R1       | AGTCGAGTTTCCCGCATT     |
| U2             | U2_F1       | CTCGGCCTTTTGGCTAAGAT   |
|                | U2_R1       | CGCCAAAAATCCGTTTAAT    |
| U1_uncleaved   | U1_F4       | AGACACCATGATCAGGCAGG   |
|                | U1_3'_R4    | TTGAACCGCGCAAATCAGG    |
| U2_uncleaved   | U2_F1       | CTCGGCCTTTTGGCTAAGAT   |
|                | U2_3'_R     | CGCCTTCCTTCTCTCCTTC    |
